# Supplementary material for: Treatment of symptomatic hyponatremia with hypertonic saline: a real-life observational study
Source: PubMed Central journal article supplement (PMC8052513; doi:10.1530/eje-20-1207), 2021-02-25
Supplement: supplementary_table_1.pdf [file supplementary_table_1.pdf]

Supplementary Table 1. Underlying cause of hyponatremia

| Underlying cause                                | n (%)    |
|-------------------------------------------------|----------|
| Diuretic therapy                                | 19 (31%) |
| Thiazide-type diuretic                          | 18 (30%) |
| Loop diuretics                                  | 3 (5%)   |
| Acute infection                                 | 21 (34%) |
| Respiratory tract                               | 9 (15%)  |
| Gastrointestinal                                | 7 (11%)  |
| Urinary tract                                   | 3 (5%)   |
| Unknown etiology                                | 4 (6%)   |
| Acute decompensated heart failure               | 8 (13%)  |
| Adrenal insufficiency                           | 8 (13%)  |
| SIADH                                           | 7 (11%)  |
| Unknown origin                                  | 3 (5%)   |
| Water intoxication due to desmopressin overdose | 2 (3%)   |
| Alcohol intoxication                            | 2 (3%)   |
| Acute liver failure                             | 1 (2%)   |
| Acute renal failure                             | 1 (2%)   |
| Chemotherapy                                    | 1 (2%)   |
| Psychotropic drugs                              | 1 (2%)   |
| Recreational drugs                              | 1 (2%)   |
| Water intoxication due to primary polydipsia    | 1 (2%)   |
