# Supplementary material for: Treatment of symptomatic hyponatremia with hypertonic saline: a real-life observational study
Source: PubMed Central journal article supplement (PMC8052513; doi:10.1530/eje-20-1207), 2021-02-25
Supplement: supplementary_table_2.pdf [file supplementary_table_2.pdf]

Supplementary Table 2. Pre-existing conditions and medication according to symptom severity and treatment

|                                       | Moderate symptoms<br>(n=33) | Severe symptoms<br>(n=29) | p  | Conventional treatment group<br>(n=26) | Hypertonic saline group<br>(n=36) | p  |
|---------------------------------------|-----------------------------|---------------------------|----|----------------------------------------|-----------------------------------|----|
| <b>Pre-existing conditions, n (%)</b> |                             |                           |    |                                        |                                   |    |
| Diabetes mellitus                     | 4 (12)                      | 4 (14)                    | NS | 3 (12)                                 | 5 (14)                            | NS |
| Diabetes insipidus                    | 0 (0)                       | 1 (3)                     | NS | 0 (0)                                  | 1 (3)                             | NS |
| Chronic kidney disease                | 17 (52)                     | 9 (31)                    | NS | 12 (46)                                | 14 (39)                           | NS |
| Hepatopathy                           | 3 (9)                       | 5 (17)                    | NS | 2 (8)                                  | 6 (17)                            | NS |
| Heart failure                         | 7 (21)                      | 4 (14)                    | NS | 5 (19)                                 | 6 (17)                            | NS |
| Adrenal insufficiency                 | 4 (12)                      | 3 (10)                    | NS | 4 (15)                                 | 3 (8)                             | NS |
| Psychiatric disorders                 | 4 (12)                      | 6 (21)                    | NS | 7 (27)                                 | 3 (8)                             | NS |
| SIADH                                 | 1 (3)                       | 1 (3)                     | NS | 1 (4)                                  | 1 (3)                             | NS |
| <b>Medication, n (%)</b>              |                             |                           |    |                                        |                                   |    |
| Psychiatric medication                | 10 (30)                     | 4 (14)                    | NS | 8 (31)                                 | 6 (17)                            | NS |
| Diuretics                             | 20 (61)                     | 12 (41)                   | NS | 12 (46)                                | 20 (56)                           | NS |
| Analgesics                            | 5 (15)                      | 7 (24)                    | NS | 6 (23)                                 | 6 (17)                            | NS |
| Glucocorticoids                       | 6 (18)                      | 3 (10)                    | NS | 3 (12)                                 | 6 (17)                            | NS |
| Mineralocorticoids                    | 1 (3)                       | 0 (0)                     | NS | 1 (4)                                  | 0 (0)                             | NS |
| Chemotherapy                          | 2 (6)                       | 3 (10)                    | NS | 2 (8)                                  | 3 (8)                             | NS |
| Vasopressin analogues                 | 0 (0)                       | 2 (7)                     | NS | 0 (0)                                  | 2 (6)                             | NS |
