# Supplementary material for: Treatment of symptomatic hyponatremia with hypertonic saline: a real-life observational study
Source: PubMed Central journal article supplement (PMC8052513; doi:10.1530/eje-20-1207), 2021-02-25
Supplement: supplementary_table_3.pdf [file supplementary_table_3.pdf]

Supplementary Table 3. Correction of serum sodium within recommended range and overcorrection rate at 24 and 48 hours after admission according to treatment, symptom severity and serum sodium at admission

| Patients                                   | Correction of serum sodium<br>within recommended range (%) |        | Overcorrection rate (%) |        |
|--------------------------------------------|------------------------------------------------------------|--------|-------------------------|--------|
|                                            | At 24h                                                     | At 48h | At 24h                  | At 48h |
| Whole cohort<br>(n=62)                     | 40                                                         | 66     | 21                      | 10     |
| Hypertonic saline<br>bolus group<br>(n=36) | 50                                                         | 69     | 28                      | 14     |
| Conventional<br>treatment group<br>(n=26)  | 27                                                         | 62     | 12                      | 4      |
| Severe symptoms<br>(n=29)                  | 36                                                         | 63     | 38*                     | 17     |
| Moderate<br>symptoms (n=33)                | 45                                                         | 69     | 6                       | 3      |
| sNa < 120 mEq/L<br>at admission<br>(n=30)  | 53                                                         | 80†    | 37†                     | 17     |
| sNa ≥ 120 mEq/L<br>at admission<br>(n=32)  | 28                                                         | 53     | 6                       | 3      |

\* p<0.05 compared to moderate symptoms

† p<0.05 compared to sNa ≥ 120 mEq/L at admission
