# Supplementary material for: Treatment of symptomatic hyponatremia with hypertonic saline: a real-life observational study
Source: PubMed Central journal article supplement (PMC8052513; doi:10.1530/eje-20-1207), 2021-02-25
Supplement: supplementary_table_4.pdf [file supplementary_table_4.pdf]

Supplementary Table 4. Diuresis (ml, median (min, max)) during the first 24 hours after admission according to treatment, symptom severity and overcorrection status.

| Symptom severity |            |    | Therapy group |            |    | Overcorrection |            |      |
|------------------|------------|----|---------------|------------|----|----------------|------------|------|
| moderate         | severe     | p  | CT            | HS         | p  | no             | yes        | p    |
| 2000             | 2700       | NS | 1550          | 3530       | NS | 1500           | 4000       | 0.02 |
| (0-4700)         | (450-7080) |    | (0-4700)      | (450-7080) |    | (0-4700)       | (870-7080) |      |

\*CT: conventional treatment, HS: hypertonic saline
