# Supplementary material for: Treatment of symptomatic hyponatremia with hypertonic saline: a real-life observational study
Source: PubMed Central journal article supplement (PMC8052513; doi:10.1530/eje-20-1207), 2021-02-25
Supplement: supplementary_table_5.pdf [file supplementary_table_5.pdf]

Supplementary Table 5. Length of hospital stay (days, median (min, max)) according to treatment, symptom severity and overcorrection status at 24 h.

| Symptom severity |            |    | Therapy group |            |    | Overcorrection |           |    |
|------------------|------------|----|---------------|------------|----|----------------|-----------|----|
| moderate         | severe     | p  | CT            | HS         | p  | no             | yes       | p  |
| 9 (2-196)        | 11 (2-136) | NS | 8 (2-196)     | 11 (2-136) | NS | 9 (2-196)      | 11 (5-41) | NS |

\*CT: conventional treatment, HS: hypertonic saline
